# Supplementary material for: Synthesis of novel and stable g-C3N4/N-doped SrTiO3hybrid nanocomposites with improved photocurrent and photocatalytic activity under visible light irradiation
Source: Royal Society of Chemistry journal article supplement (doi:10.1039/c4dt01076k), 2014-08-28
Supplement: c4dt01076k1.pdf [file c4dt01076k1.pdf]

**Synthesis of novel and stable g-C<sub>3</sub>N<sub>4</sub>/N-doped SrTiO<sub>3</sub> hybrid nanocomposites with improved photocurrent and photocatalytic activity under visible light irradiation**

Santosh Kumar<sup>a</sup>, Surendar T<sup>a</sup>, Arabinda Baruah<sup>b</sup>, Bharat Kumar<sup>b</sup>, and Vishnu Shanker<sup>a\*</sup>

<sup>a</sup>Department of Chemistry, National Institute of Technology Warangal-506004, A.P., India

<sup>b</sup>Department of Chemistry, Indian Institute of Technology Delhi, New Delhi-110016, India

\*Corresponding Author. Tel.: +91-870-2462675; Fax: +91-870-2459547; *E-mail address*:

vishnu@nitw.ac.in

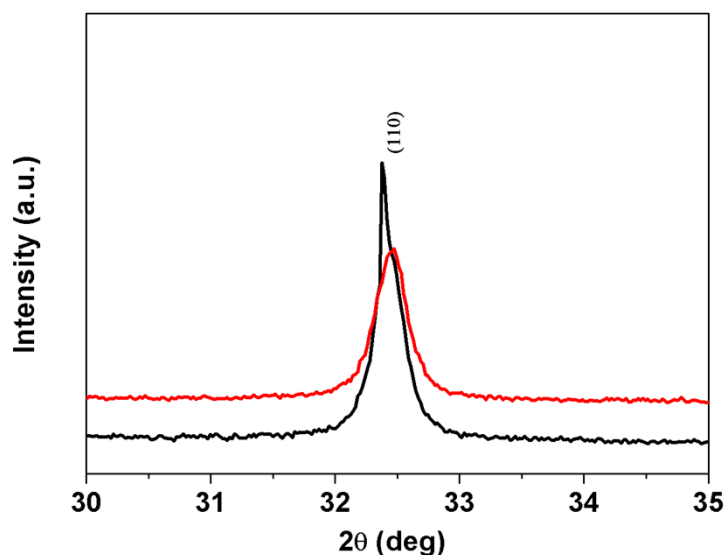

Fig. S1 Bragg's angle shift of (110) for the prepared samples.

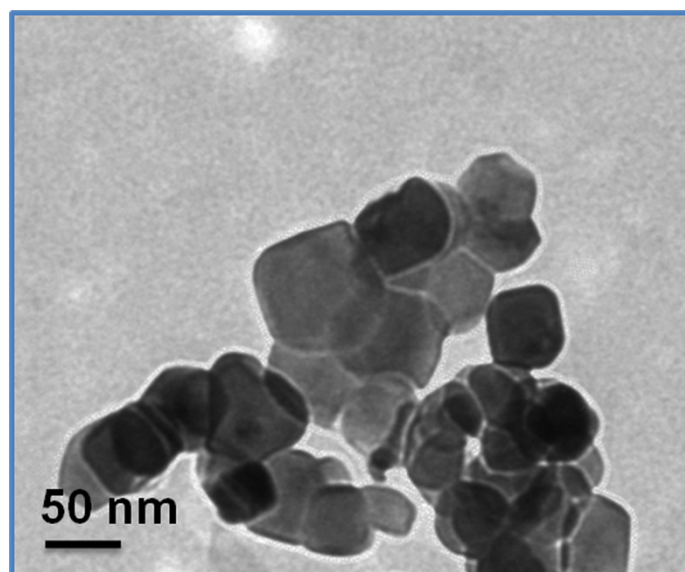

Fig. S2 TEM image of the N-doped SrTiO<sub>3</sub>.

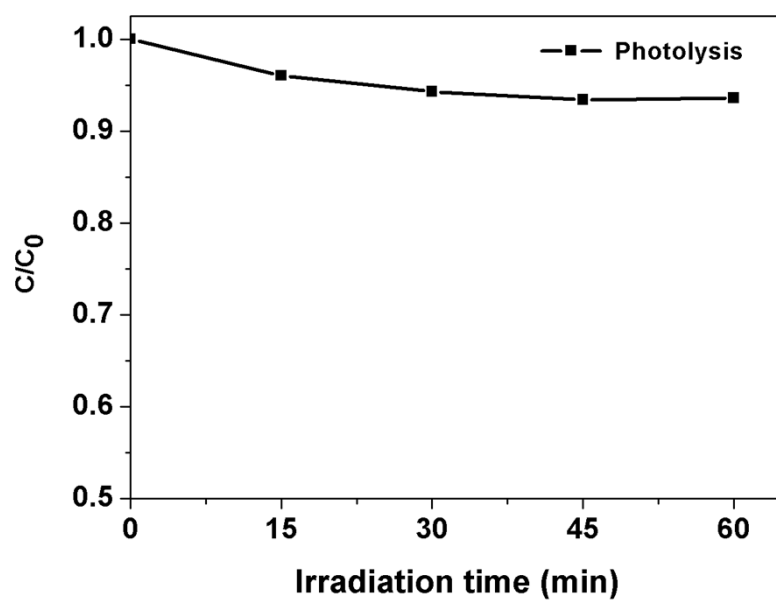

Fig. S3 Photolysis of RhB under visible light.

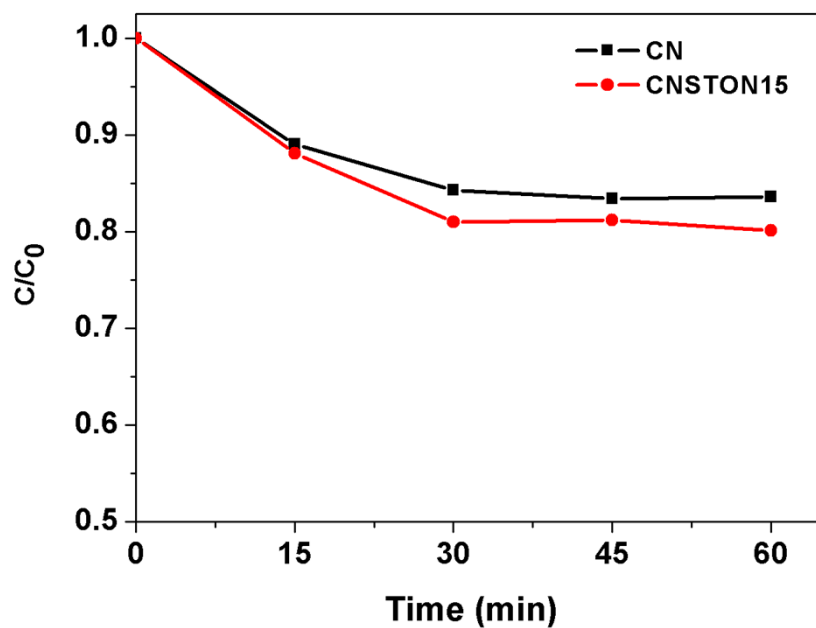

Fig. S4 Adsorption ability of CN and CNSTON15 for degradation of RhB under dark condition for 60 min duration.

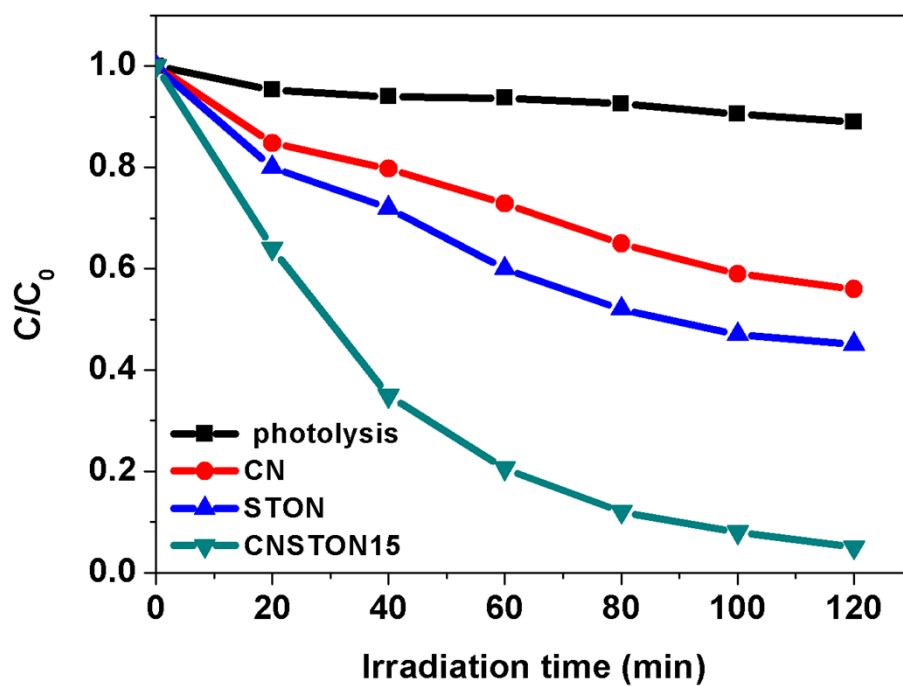

Fig. S5 Photocatalytic activity of the prepared photocatalysts for the degradation of 4-chlorophenol under visible light irradiation.

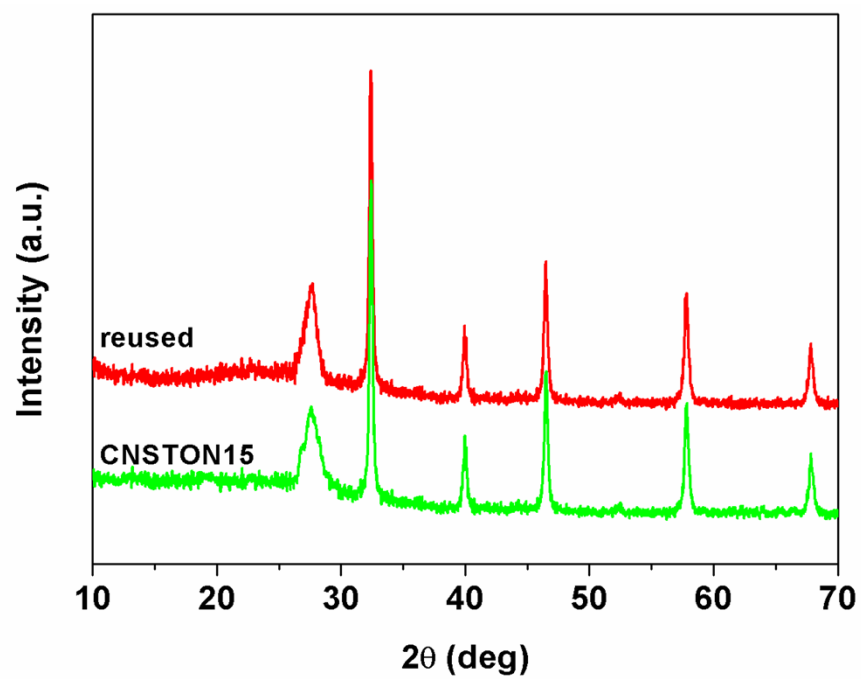

Fig. S6 XRD pattern of reused CNSTON15 photocatalyst after 5<sup>th</sup> cycle.
